# Supplementary material
Source: PubMed Central journal article supplement (PMC357025)
Supplement: pnas_0308127100_5.pdf [file pnas_0308127100_5.pdf]

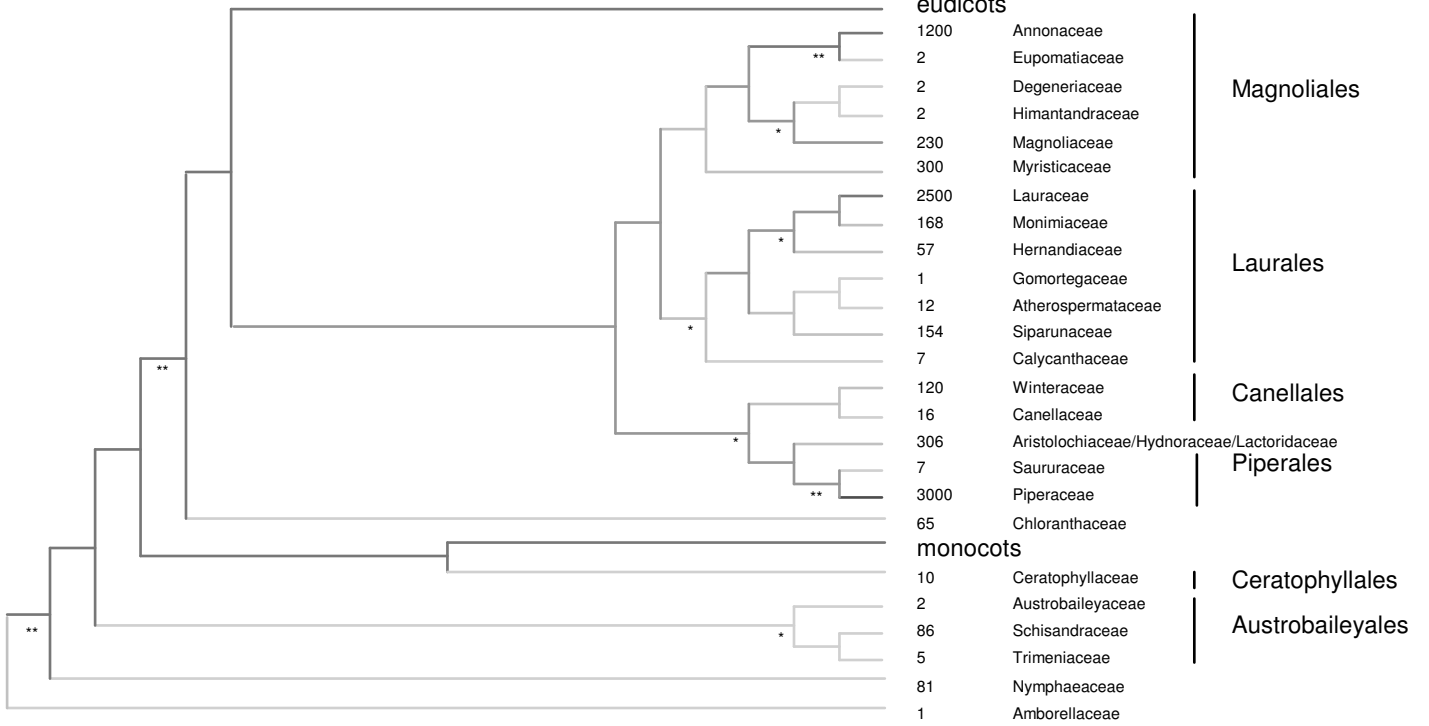

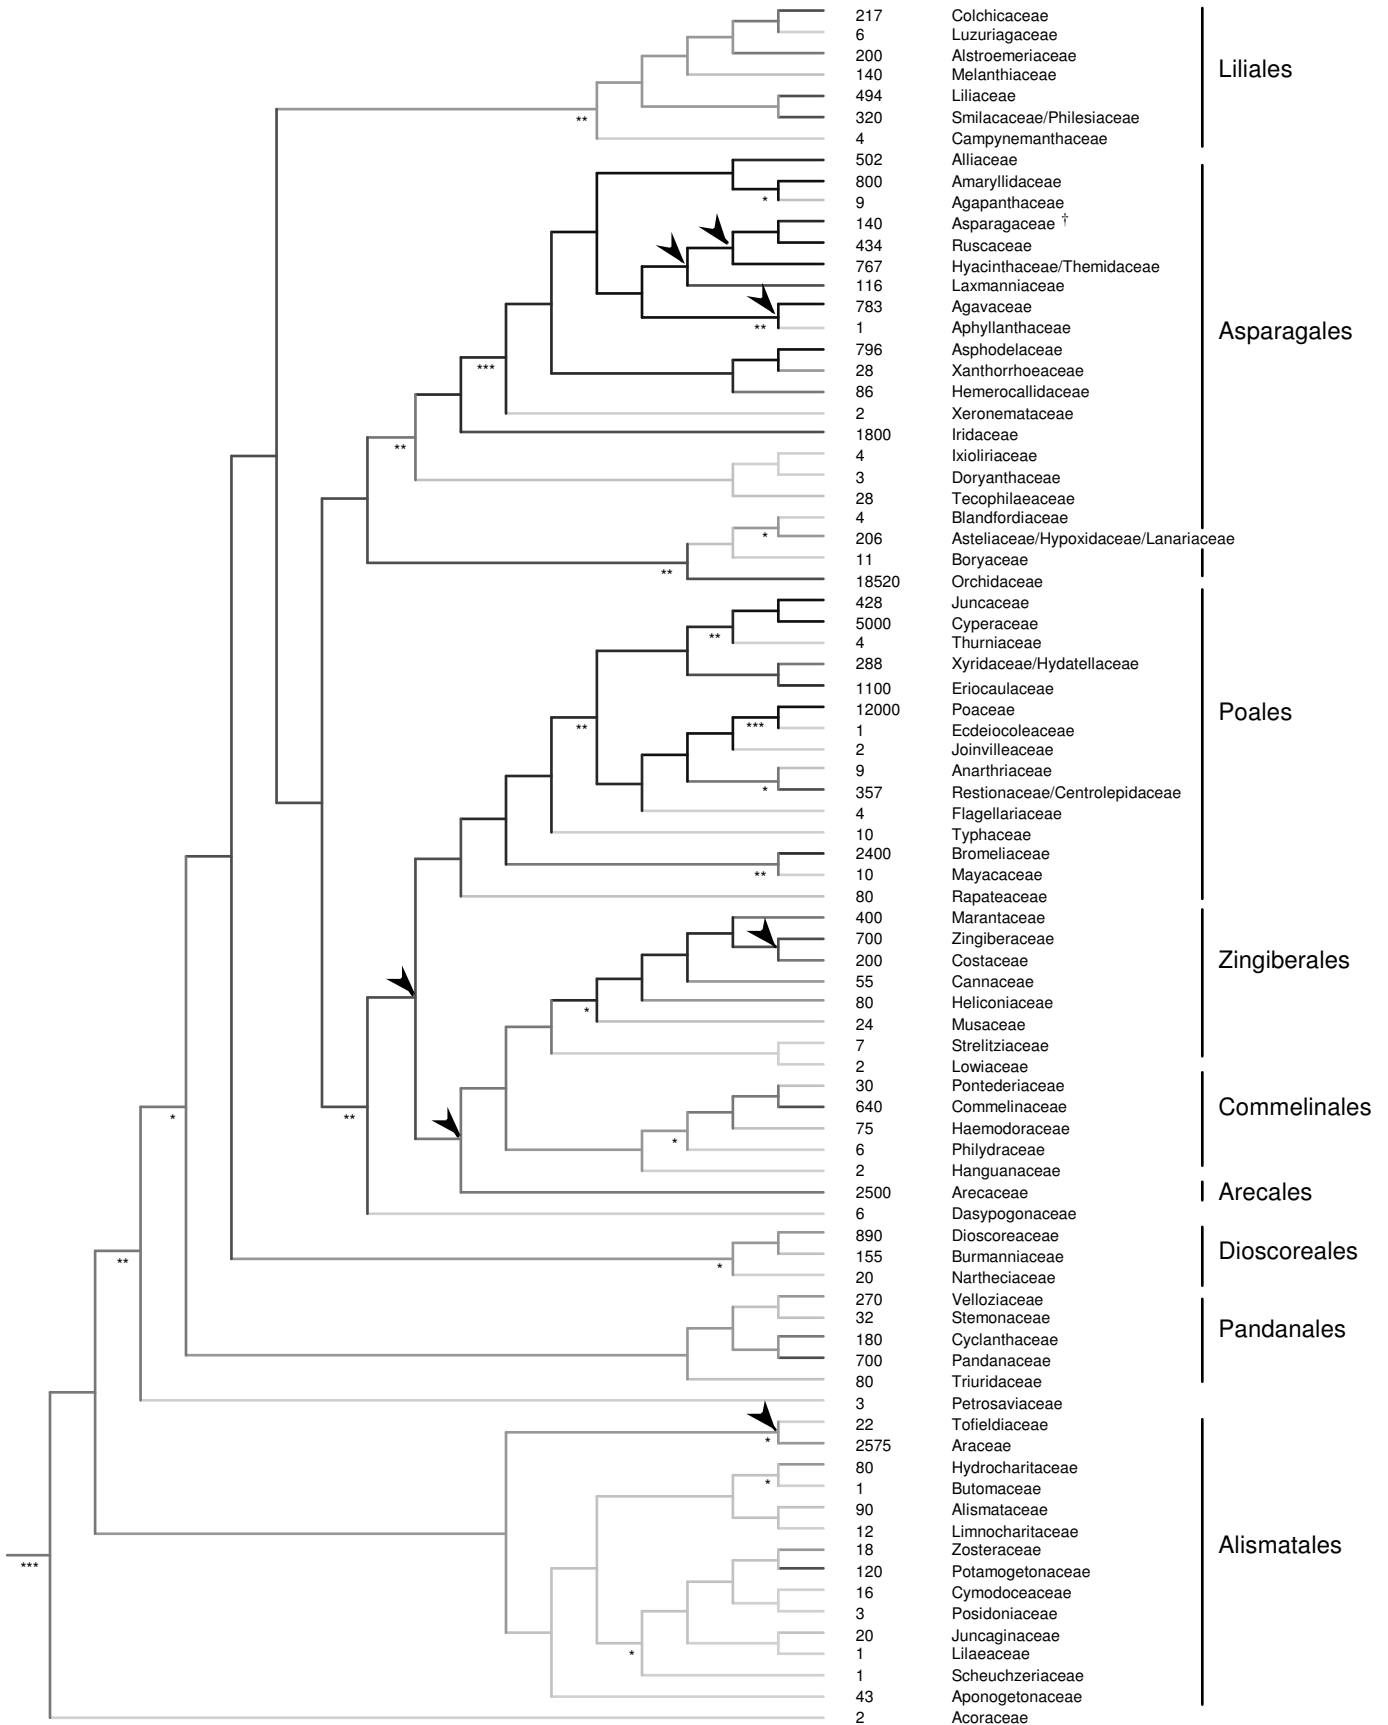

monocots

rosids  
euasterids I & II

- 341 Actinidiaceae
- 2 Roridulaceae
- 14 Sarraceniaceae
- 3350 Ericaceae
- 13 Cyrillaceae
- 120 Clethraceae
- 301 Ternstroemiaceae
- 1 Pentaphragmaceae
- 2 Sladeniaceae
- 180 Styrcaceae
- 20 Diapensiaceae
- 500 Symplocaceae
- 100 Theaceae
- 2 Ebenaceae
- 460 Lecythidaceae
- 1335 Myrsinaceae
- 615 Primulaceae
- 130 Theophrastaceae
- 100 Maesaceae
- 975 Sapotaceae
- 310 Polemoniaceae
- 11 Fouquieriaceae
- 100 Marcgraviaceae
- 5 Tetrameristaceae †
- 600 Balsaminaceae
- 212 Hydrangeaceae
- 250 Loasaceae
- 10 Nyssaceae
- 81 Cornaceae
- 5 Grubbiaceae
- 1 Aextoxicaceae
- 3 Berberidopsidaceae
- 2250 Amaranthaceae
- 10 Achatocarpaceae
- 2300 Caryophyllaceae
- 2617 Caryophyllales A ‡
- 130 Molluginaceae
- 1554 Caryophyllales B ‡
- 3 Stegnospermaceae
- 7 Asteropeiaceae
- 2 Phynsenaceae
- 1 Simmondsiaceae
- 90 Frankeniaceae
- 120 Tamaricaceae
- 775 Plumbaginaceae
- 800 Polygonaceae
- 112 Droseraceae
- 82 Nepenthaceae
- 20 Ancistrocladaceae
- 3 Dioncophyllaceae
- 1 Drosophyllaceae
- 4 Rhabdodendraceae
- 2062 Olacaceae/Santalaceae/Loranthaceae
- 400 Dilleniaceae
- 52 Gunneraceae †
- 71 Buxaceae †
- 2 Trochodendraceae †
- 107 Sabiaceae
- 1050 Proteaceae †
- 2 Nelumbonaceae
- 630 Berberidaceae
- 1500 Ranunculaceae
- 520 Menispermaceae
- 45 Lardizabalaceae
- 1 Circaeasteraceae
- 2 Eupteleaceae
- 665 Papaveraceae

Ericales

Cornales

Caryophyllales

Proteales

Ranunculales

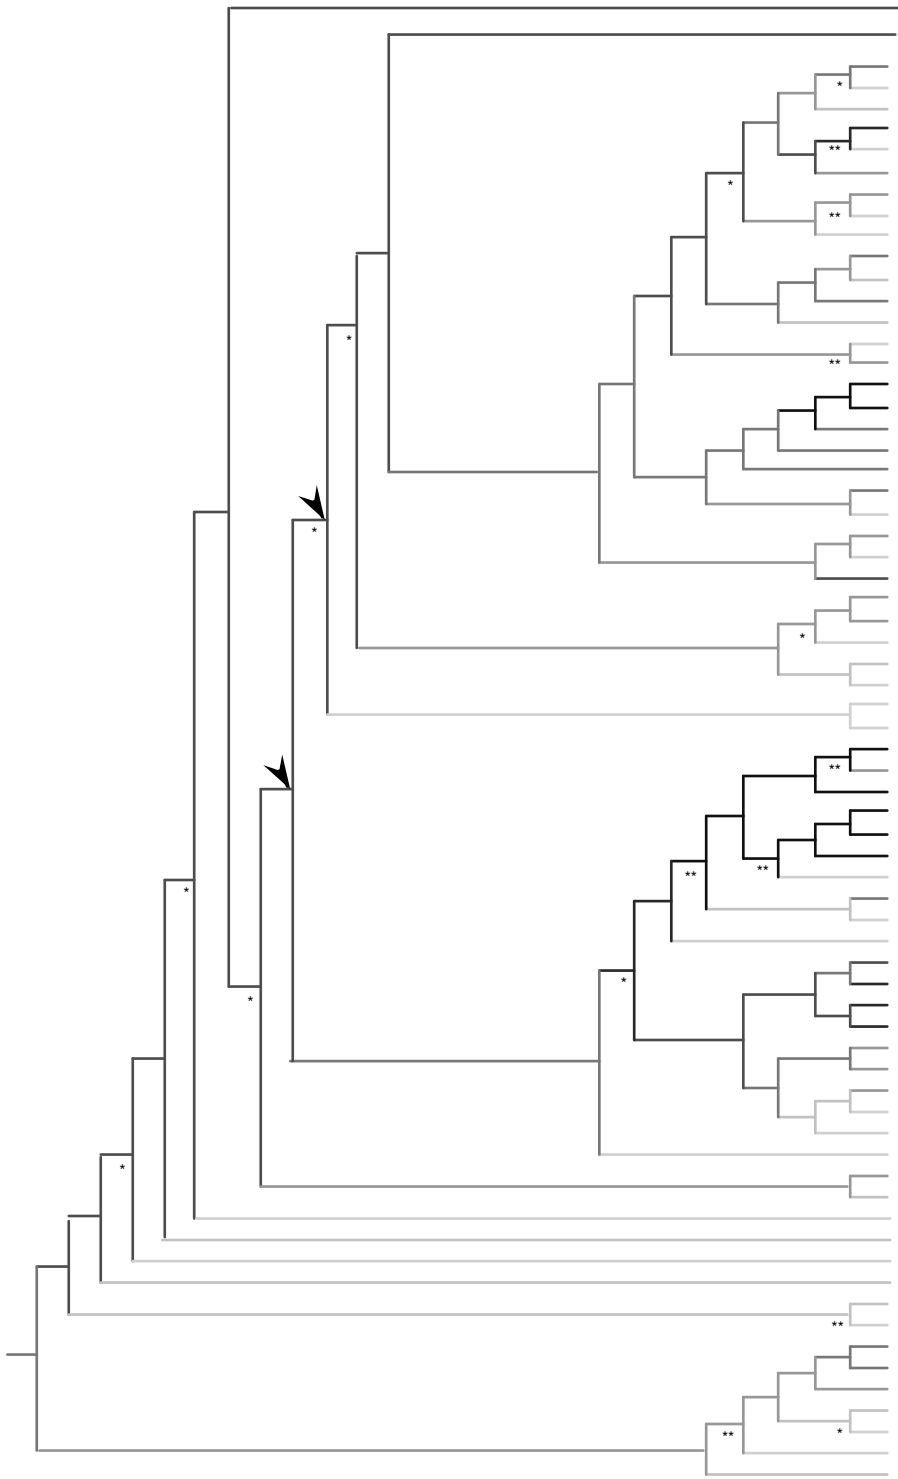

eudicots

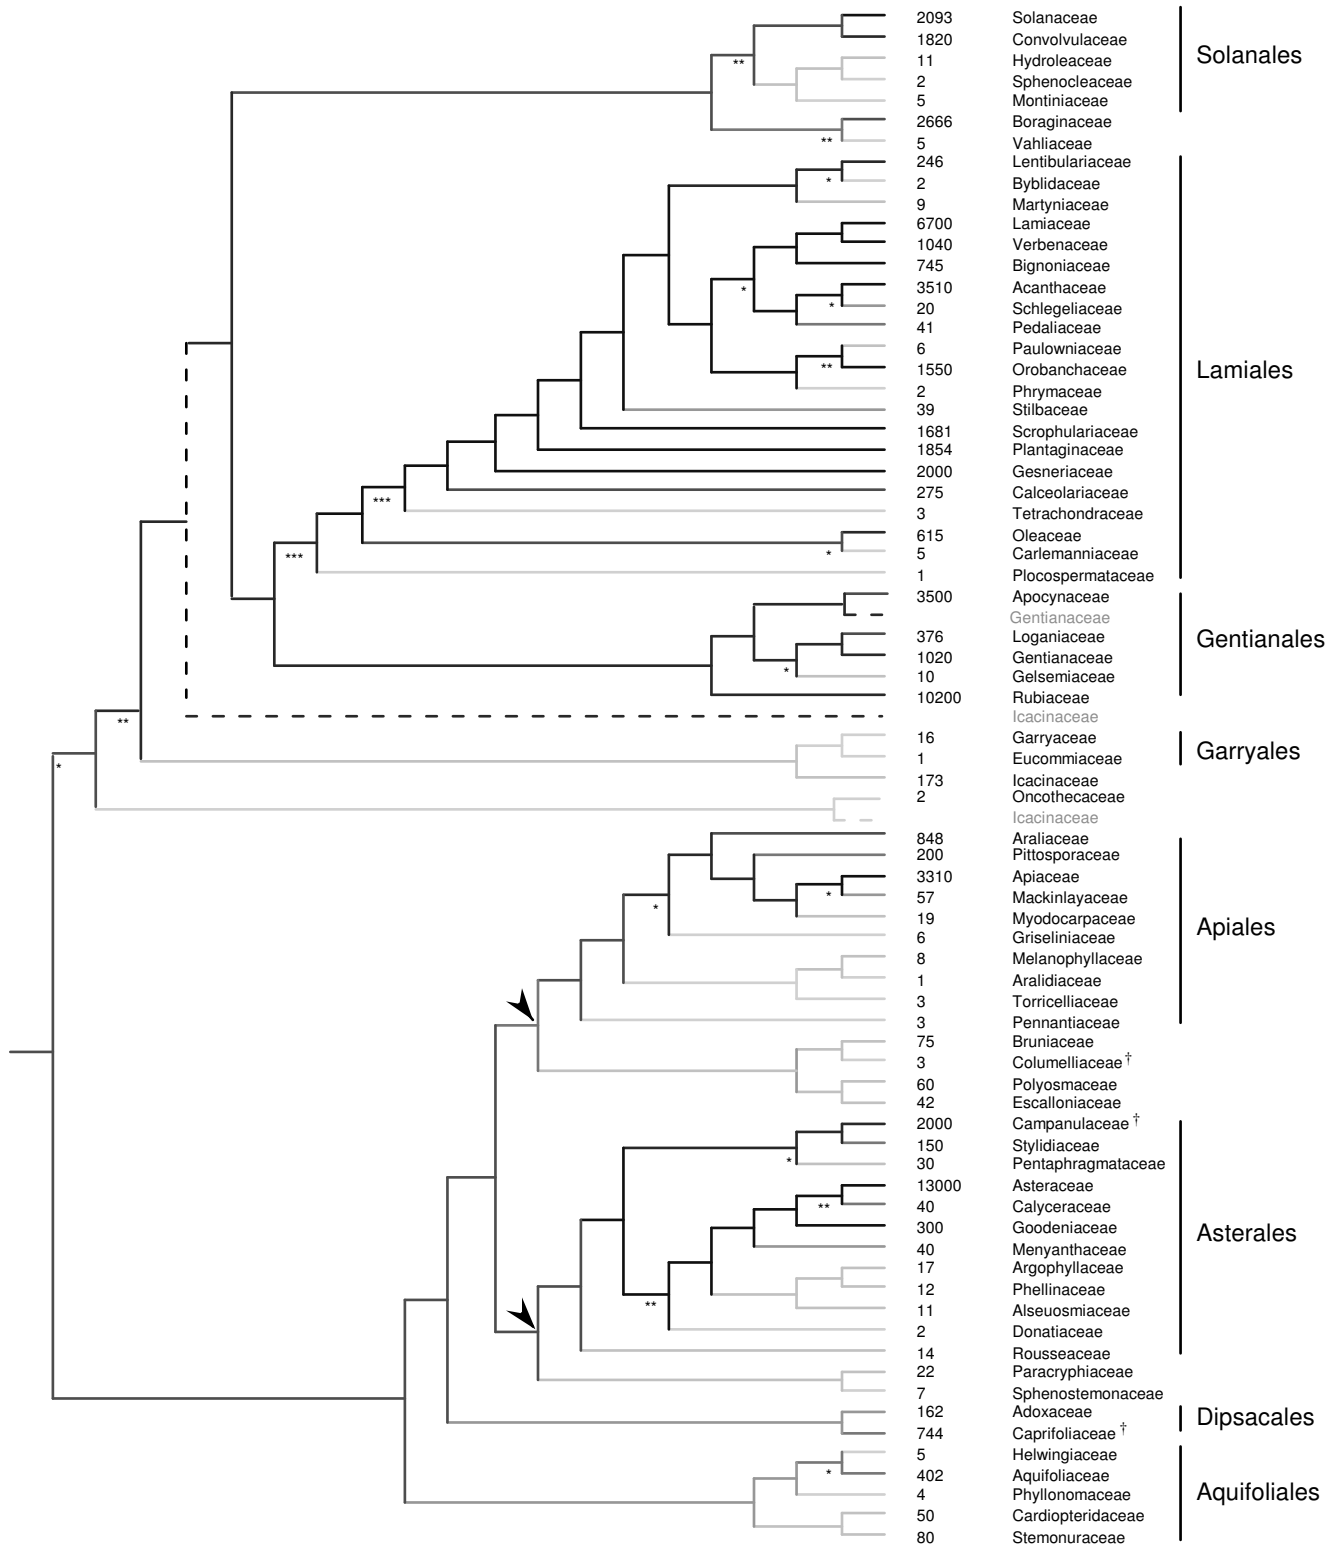

euasterids I & II

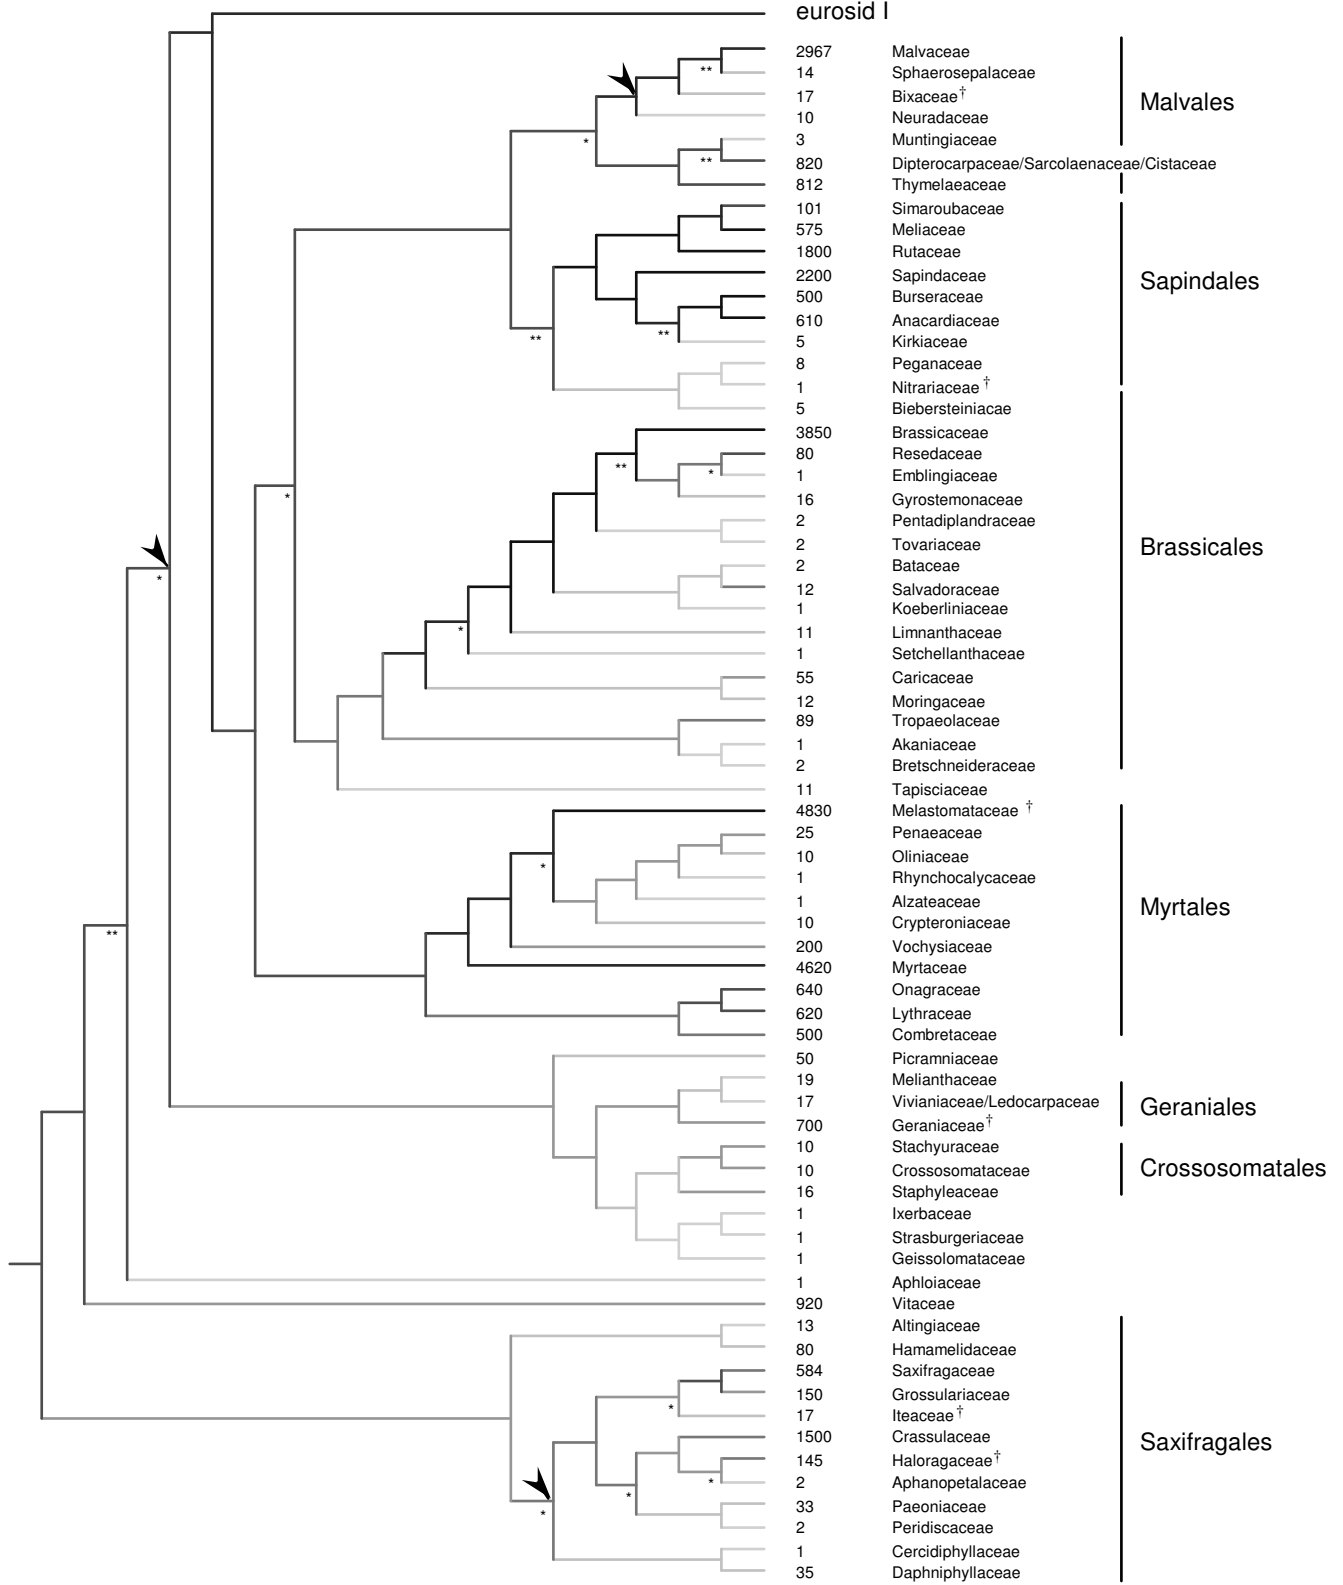

Malvales

Sapindales

Brassicales

Myrtales

Geraniales

Crossosomatales

Saxifragales

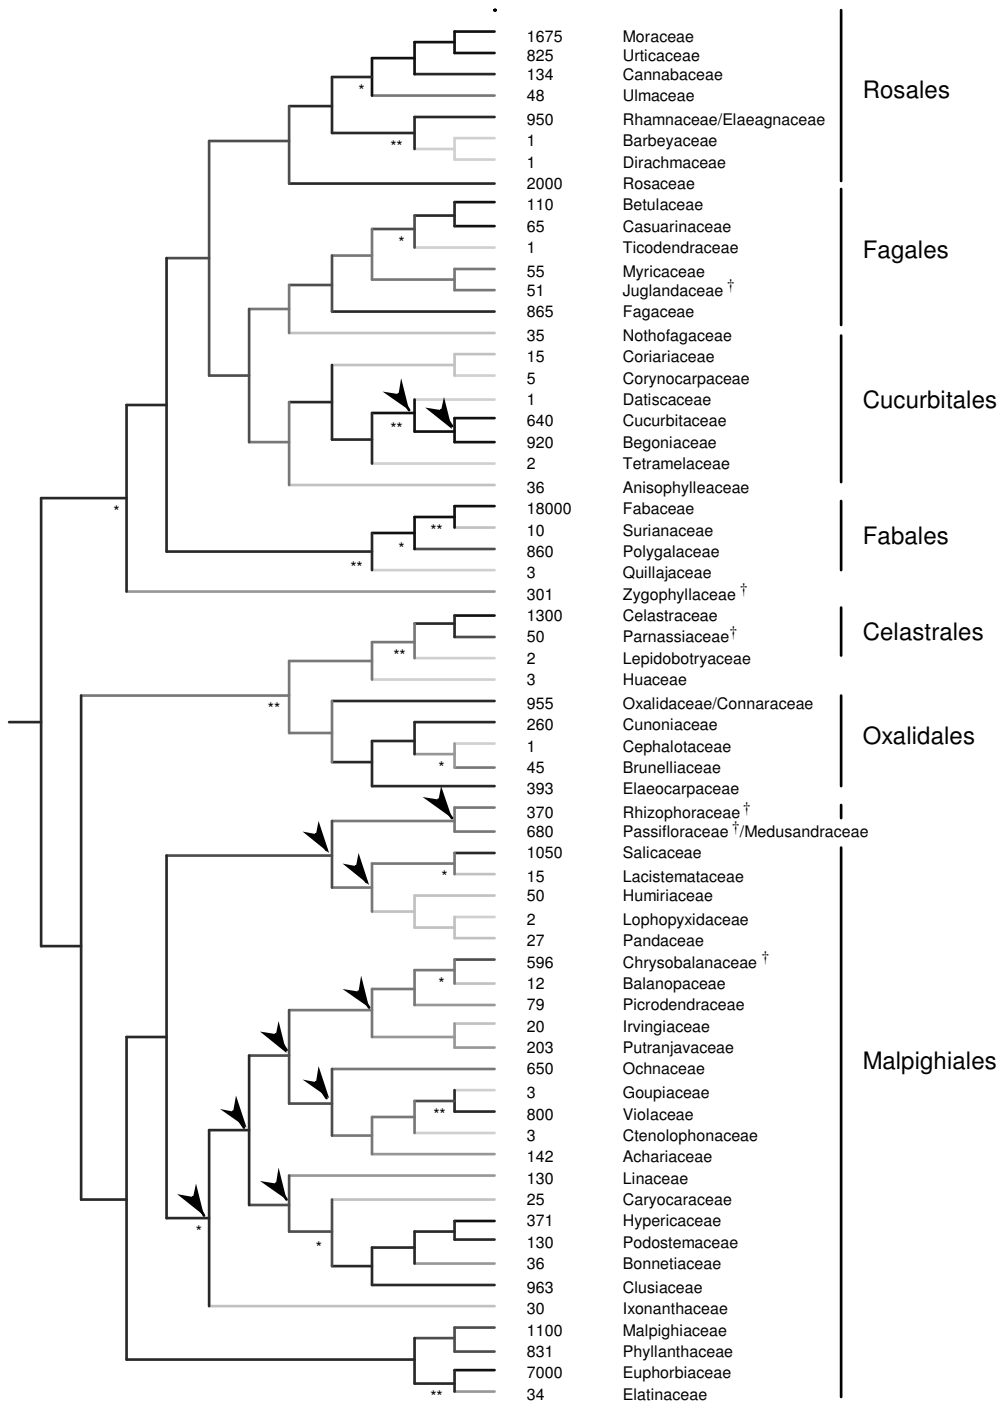

**euroids I**
