# Supplementary material
Source: PubMed Central journal article supplement (PMC357025)

a.

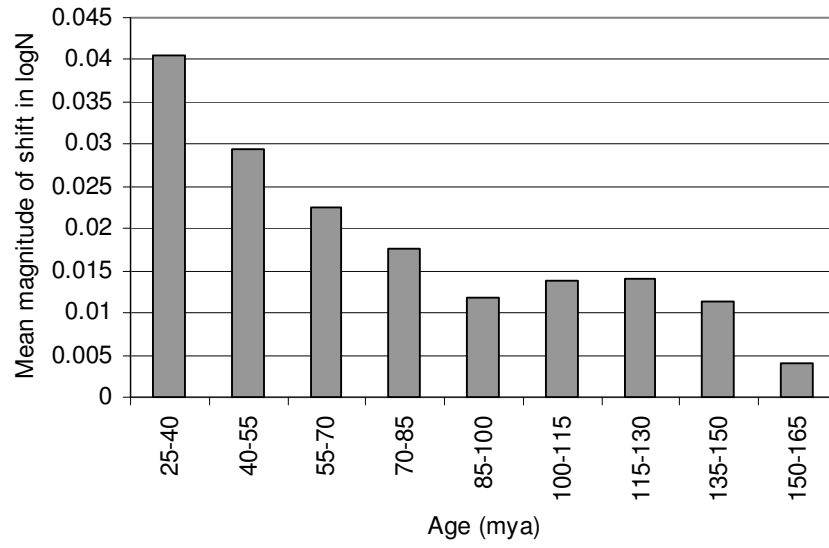

b.

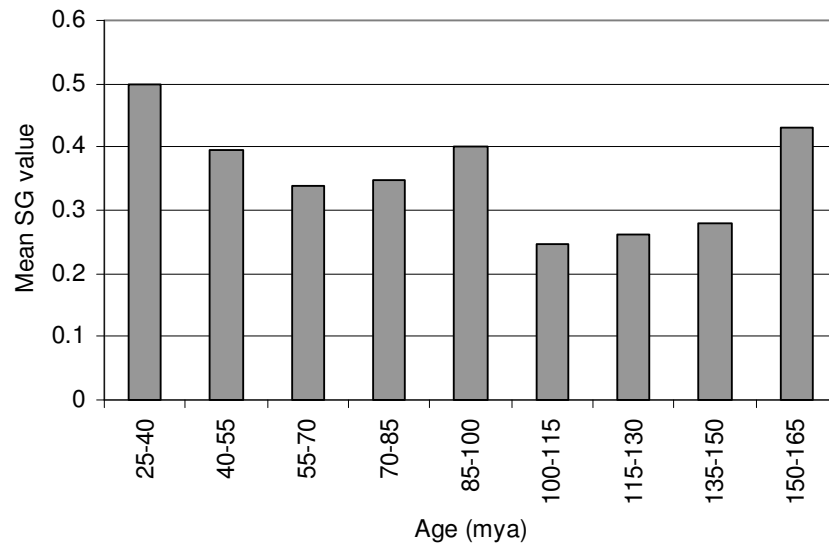

Supplement: pnas_0308127100_7.pdf [file pnas_0308127100_7.pdf]

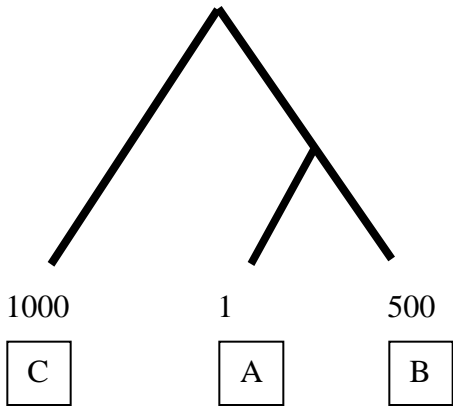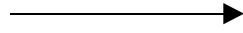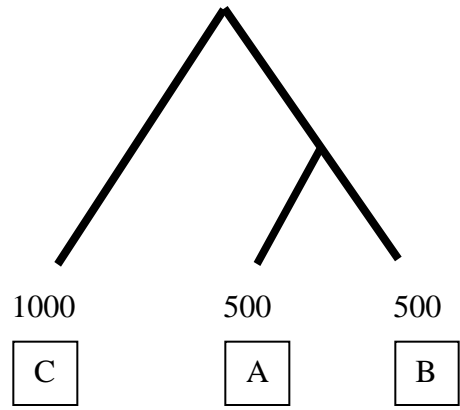

Supplement: pnas_0308127100_9.pdf [file pnas_0308127100_9.pdf]
